# Supplementary material for: Double-walled pyr topology networks from a novel fluoride-bridged heptanuclear metal cluster
Source: Royal Society of Chemistry journal article supplement (doi:10.1039/c5sc01515d), 2015-01-01
Supplement: c5sc01515d1.pdf [file c5sc01515d1.pdf]

# Double-Walled pyr Topology Networks from a Novel Fluoride-Bridged Heptanuclear Metal Cluster

*Kai Jie Chen, John J. Perry IV, Hayley S. Scott, Qing-Yuan Yang and Michael J. Zaworotko\**

Department of Chemical & Environmental Sciences, University of Limerick, Limerick, Republic of  
Ireland

E-mail: [Michael.Zaworotko@ul.ie](mailto:Michael.Zaworotko@ul.ie)

# Supplementary Index

## Experimental Section

### X-Ray crystallography

**Table 1. Crystal Data and Structure Refinement for Tripp-1-Co**

**Figure S1. Short F...F interaction in Tripp-1-Co**

**Figure S2. The packing views along  $a$  and  $[111]$  axis**

**Figure S3. X-ray photoelectron spectroscopy of Tripp-1-Co sample from the reflux reaction**

**Figure S4. Infrared Spectrogram of Tripp-1-Co and Tripp-1-Ni samples from the reflux reactions**

**Figure S5. The powder X-ray diffraction patterns at different conditions of Tripp-1-Co**

**Figure S6. The powder X-ray diffraction patterns at different conditions of Tripp-1-Ni**

**Figure S7. The powder X-ray diffraction patterns after sorption measurements**

**Figure S8. Thermo gravimetric analysis of Tripp-1-Co and Tripp-1-Ni**

**Figure S9. The Virial fit of CO<sub>2</sub> isotherms of Tripp-1-Co and Tripp-1-Ni**

**Figure S10. The isosteric heats of adsorption of Tripp-1-Co and Tripp-1-Ni**

## **Experimental Section**

**Materials and Physical Measurements.** Commercially available reagents were used as received without further purification. Thermo-gravimetric (TG) analyses were performed under N<sub>2</sub> using a TA Q50 system. Powder X-ray diffraction (PXRD) patterns were recorded on a PANalytical X'Pert MPD Pro using Cu K $\alpha$  radiation with a 1D X'Celerator strip detector. Gas sorption isotherms were measured using Micromeritics Tristar II 3030 and 3Flex 3500 surface characterization analyzers. The two MeOH-exchanged samples were desolvated under high vacuum at room temperature for 16 h to remove the MeOH molecules in the pores before the measurements.

**Synthesis of single crystal sample [Co<sub>7</sub>F<sub>12</sub>(Tripp)<sub>4</sub>](SiF<sub>6</sub>)·g:** A mixture of Co(NO<sub>3</sub>)<sub>2</sub>·6H<sub>2</sub>O (0.07 mmol, 0.021 g), **Tripp** (0.04 mmol, 0.012 g), (NH<sub>4</sub>)<sub>2</sub>SiF<sub>6</sub> (0.07 mmol, 0.012 g) and DMF (3 mL) was added to a 10-mL glass vial, and then the vial capped tightly was put into the oven at 120 °C for 48 h, which was then cooled to room temperature. After rinsed several times with fresh DMF, orange single octahedral-shaped crystals were gained for single crystal X-ray diffraction experiment.

**Synthesis of [Co<sub>7</sub>F<sub>12</sub>(Tripp)<sub>4</sub>](NO<sub>3</sub>)<sub>2</sub>·g (**Tripp-1-Co**):** A mixture of Co(NO<sub>3</sub>)<sub>2</sub>·6H<sub>2</sub>O (2.8 mmol, 0.814 g), **Tripp** (1.6 mmol, 0.496 g), NH<sub>4</sub>F (4.8 mmol, 0.177 g), DMF (120 mL) and MeOH (30 mL) was added to a 250-mL round-bottom flask, and then reacted in reflux at 120 °C for 48 h, which was then cooled to room temperature. After decanting the mother liquor, the orange crystalline product dried in the air to give the yield of ca. 80% (based on Co). For gas sorption measurements, the as-synthesized sample was rinsed two times daily with fresh MeOH (100 mL × 3) for 4 days to get the MeOH-exchanged **Tripp-1-Co**. Elemental Analysis (%) for C<sub>113</sub>H<sub>188</sub>N<sub>18</sub>O<sub>57</sub>F<sub>12</sub>Co<sub>7</sub> calcd: C, 40.1; H, 5.6; N, 7.5. Found: C, 38.6; H, 5.8; N, 7.8. IR:  $\nu_{\max}$  = 3370, 3267, 2830, 1650, 1603, 1560, 1538, 1505, 1404, 1337, 1220, 1066, 1041, 1023, 828 cm<sup>-1</sup>.

**[Ni<sub>7</sub>F<sub>12</sub>(Tripp)<sub>4</sub>](NO<sub>3</sub>)<sub>2</sub>·g (**Tripp-1-Ni**):** This compound was prepared in a similar procedure as **Tripp-1-Co**, by using Ni(NO<sub>3</sub>)<sub>2</sub> (2.8 mmol, 0.816 g) in place of Co(NO<sub>3</sub>)<sub>2</sub>·6H<sub>2</sub>O. The resulting green crystalline product of **Tripp-1-Ni** was obtained in yield of 70%. The same exchanging procedure as

**Tripp-1-Co** was taken for the MeOH-exchanged **Tripp-1-Ni**. Elemental Analysis (%) for  $C_{108}H_{168}N_{18}O_{52}F_{12}Ni_7$  calcd: C, 40.2; H, 5.2; N, 7.8. Found: C, 39.1; H, 5.3; N, 8.1. IR:  $\nu_{\max} = 3385, 3081, 2820, 1604, 1539, 1506, 1470, 1400, 1318, 1220, 1066, 1042, 1024, 828, 669\text{ cm}^{-1}$ .

### X-Ray crystallography

Diffraction intensities were collected on a Bruker Quest diffractometer equipped with a CMOS detector and 1 $\mu$ S microfocus X-ray source Cu K $\alpha$  ( $\lambda = 1.5418\text{ \AA}$ ). Absorption corrections were applied by using the multi-scan program SADABS. The structures were solved with the direct method and refined with the full-matrix least-squares technique with the SHELXTL program package<sup>1</sup>. All nonhydrogen atoms were refined with anisotropic displacement parameters. Hydrogen atoms were generated geometrically. Crystallographic data were summarized in Table 1.

Table 1. Crystal Data and Structure Refinement for **Tripp-1-Co**

| Complex          | <b>Tripp-1-Co</b>                      |                               |        |
|------------------|----------------------------------------|-------------------------------|--------|
| Formula          | $C_{80}H_{56}Co_7F_{18}N_{16}O_{18}Si$ | $Z$                           | 4      |
| Formula weight   | 2312.01                                | $D_c/\text{g cm}^{-3}$        | 1.043  |
| Temperature (K)  | 100(2)                                 | reflns coll.                  | 136375 |
| Crystal system   | cubic                                  | unique reflns                 | 2575   |
| Space group      | $Pa-3$                                 | $R_{\text{int}}$              | 0.1192 |
| $a/\text{\AA}$   | 24.5063(4)                             | $R_1 [I > 2\sigma(I)]^{[a]}$  | 0.0990 |
| $b/\text{\AA}$   | 24.5063(4)                             | $wR_2 [I > 2\sigma(I)]^{[b]}$ | 0.2948 |
| $c/\text{\AA}$   | 24.5063(4)                             | $R_1$ (all data)              | 0.1276 |
| $\beta/^\circ$   | 90                                     | $wR_2$ (all data)             | 0.3245 |
| $V/\text{\AA}^3$ | 14717.5(4)                             | GOF                           | 1.026  |

[a]  $R_1 = \sum ||F_o| - |F_c|| / \sum |F_o|$ , [b]  $wR_2 = [\sum w(F_o^2 - F_c^2)^2 / \sum w(F_o^2)^2]^{1/2}$

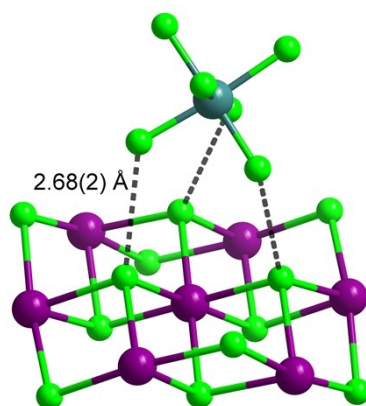

**Figure S1.** Short F...F interaction in Tripp-1-Co

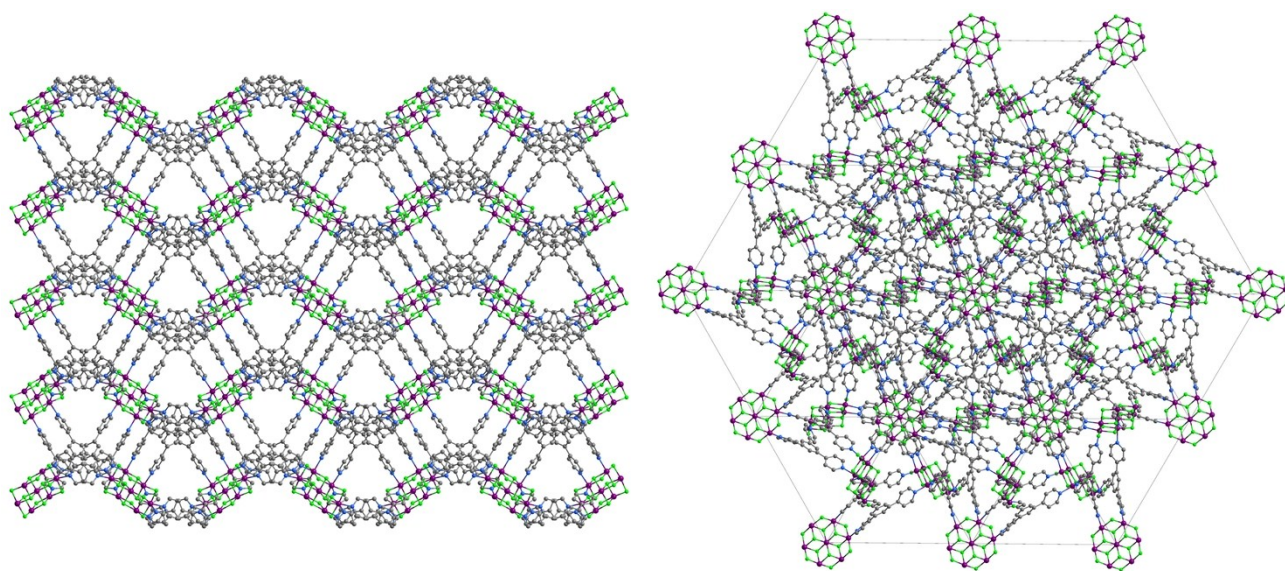

**Figure S2.** The packing views along *a* and [111] axis

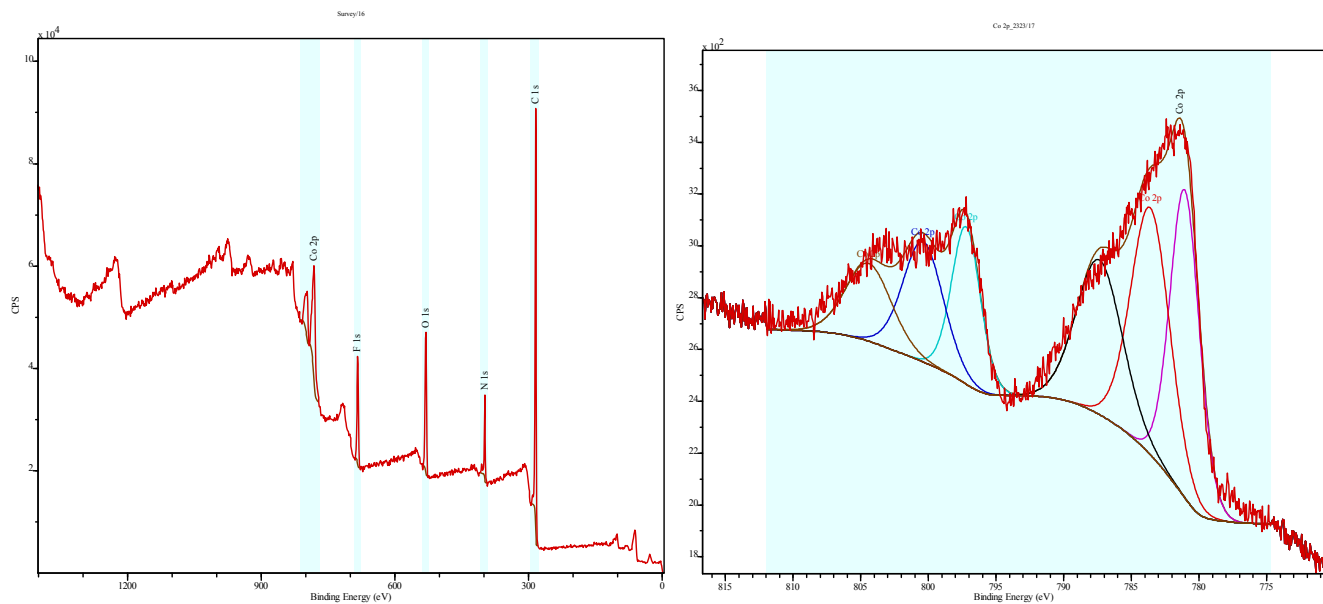

| Quantification from survey spectrum |               |               |
|-------------------------------------|---------------|---------------|
| Element                             | Position (eV) | Molar ratio % |
| O1s                                 | 530.7         | 9.9           |
| C1s                                 | 284.7         | 71.8          |
| N1s                                 | 398.7         | 8.4           |
| F1s                                 | 683.7         | 5.9           |
| Co2p                                | 781.7         | 4.1           |

**Figure S3. X-ray photoelectron spectroscopy of Tripp-1-Co sample from the reflux reaction, showing the different ratios of O, C, N, F, Co. The position of 781.7 eV for Co verifies the valence state of +2.**

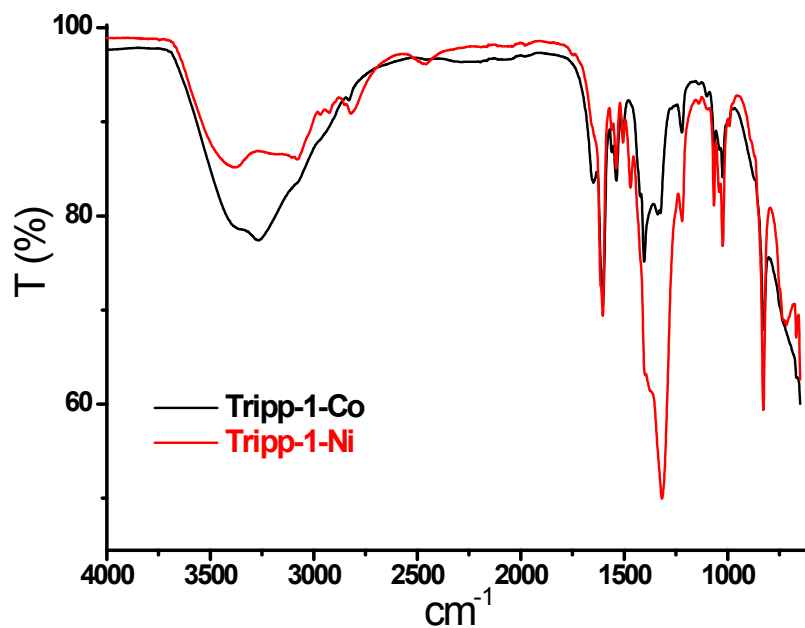

Figure S4. Infrared Spectrogram of Tripp-1-Co and Tripp-1-Ni samples from the reflux reactions.

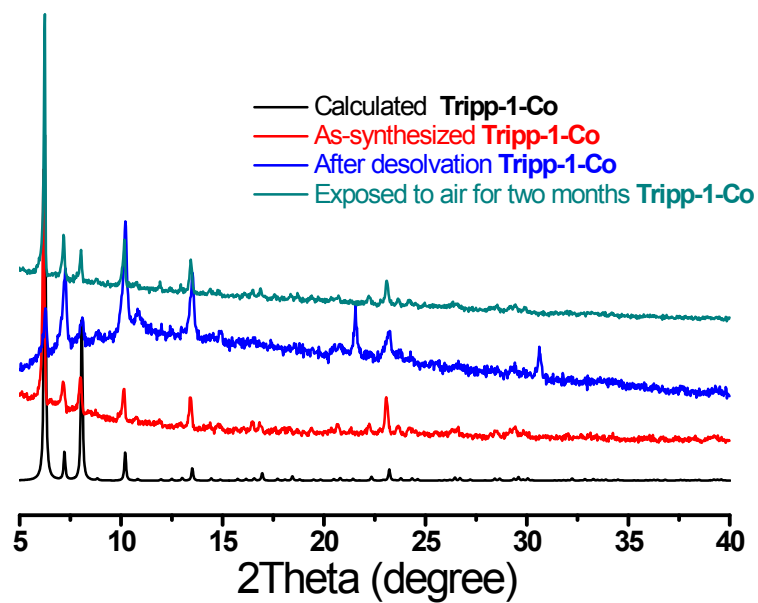

Figure S5. The powder X-ray diffraction patterns at different conditions of Tripp-1-Co

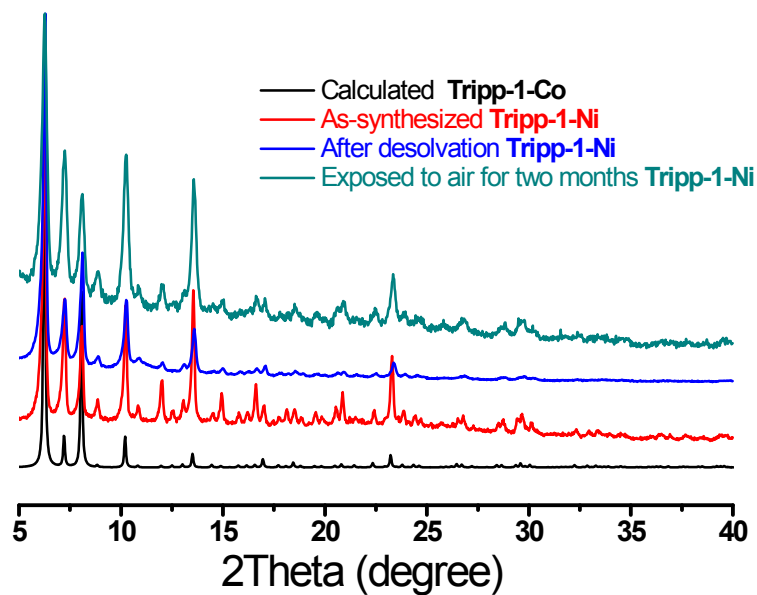

**Figure S6.** The powder X-ray diffraction patterns at different conditions of Tripp-1-Ni

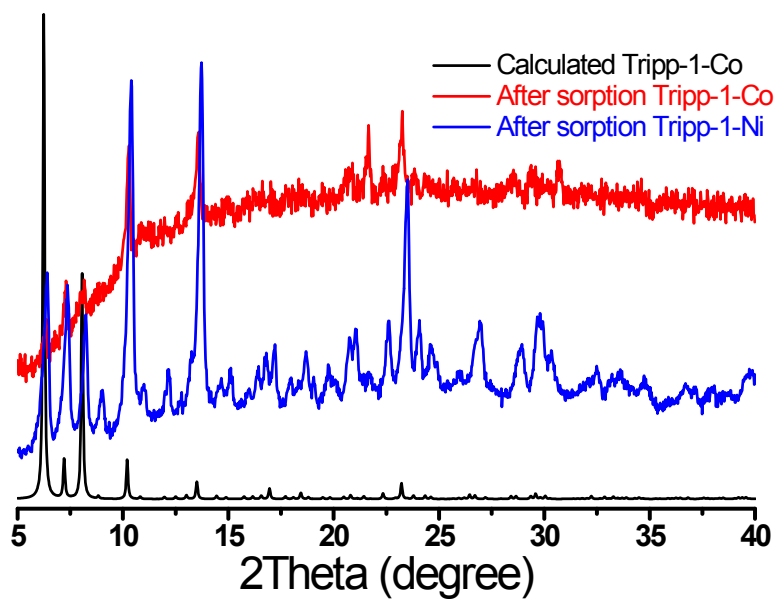

**Figure S7.** The powder X-ray diffraction patterns after sorption measurements



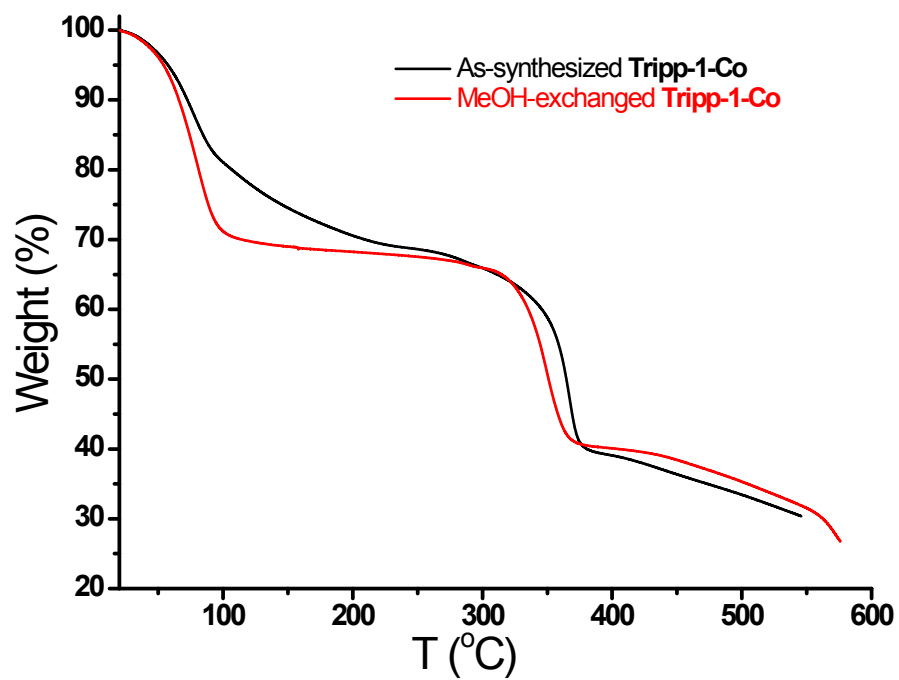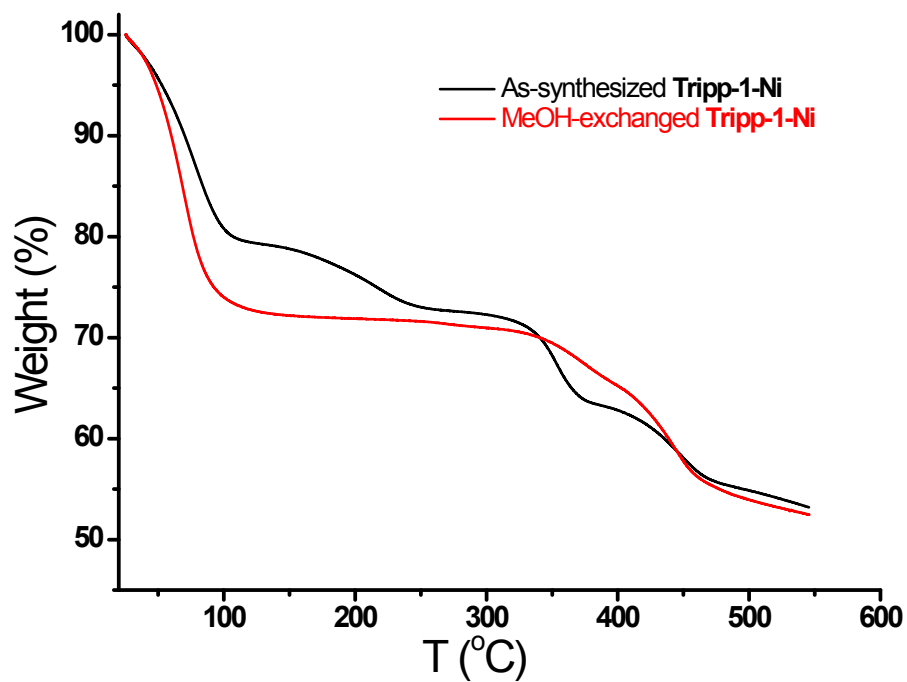

Figure S8. Thermo gravimetric analysis of Tripp-1-Co (top) and Tripp-1-Ni (bottom).

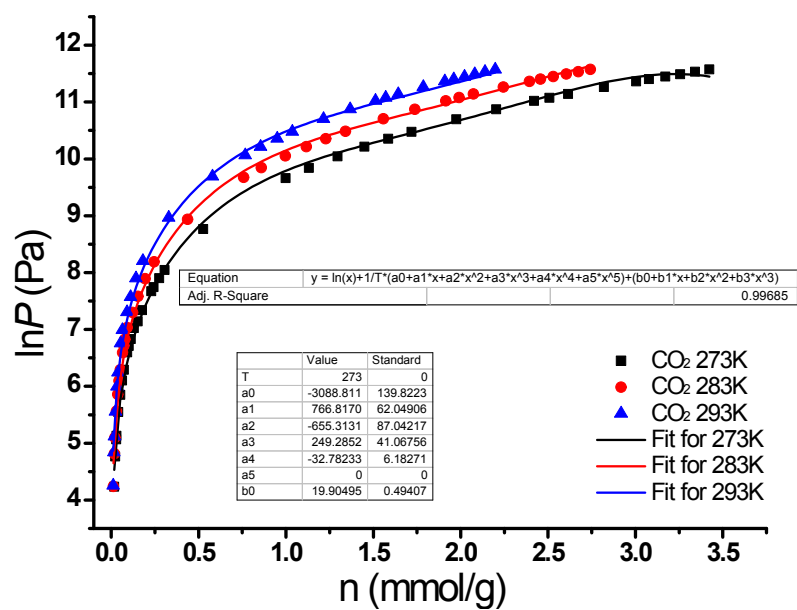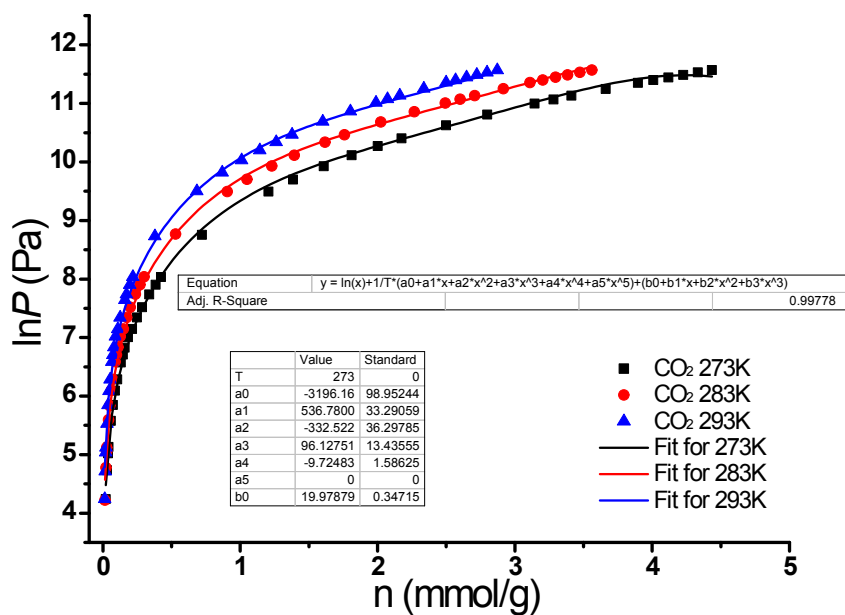

Figure S9. The Virial fit of CO<sub>2</sub> isotherms of Tripp-1-Co (top) and Tripp-1-Ni (bottom).

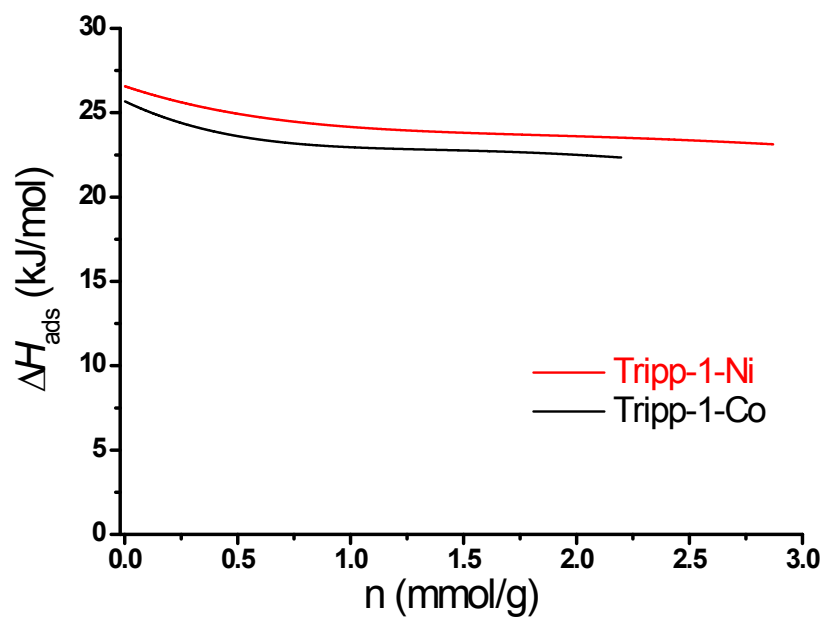

**Figure S10.** The isosteric heats of adsorption of Tripp-1-Co and Tripp-1-Ni.

#### Reference

1. Sheldrick, G. M. SHELXTL 6.12; Bruker Analytical Instrumentation: Madison, WI, 2000.
